# Supplementary material
Source: PubMed Central journal article supplement (PMC5839274)
Supplement: jamapediatr-172-1287-s001.pdf [file jamapediatr-172-1287-s001.pdf]

## Supplementary Online Content

Quach JL, Nguyen CD, Williams KE, Sciberras E. Bidirectional associations between child sleep problems and internalizing and externalizing difficulties from preschool to early adolescence. *JAMA Pediatr*. Published online December 4, 2017. doi:10.1001/jamapediatrics.2017.4363

**eTable.** Confirmatory Factor Analyses for Sleep Measures: Standardised Factor Loadings and Model Fit Indices (Chi-square Test, RMSE, CFI, and TLI)

**eFigure 1.** Autoregressive and Cross-sectional Correlations Model for Sleep, Internalizing, Hyperactivity and Conduct Problems

**eFigure 2.** Transactional Model for Sleep and Hyperactivity

**eFigure 3.** Transactional Model for Sleep and Conduct Problems

**eFigure 4.** Transactional Model for Sleep, Internalizing, Hyperactivity, and Conduct Problems

This supplementary material has been provided by the authors to give readers additional information about their work.

**eTable. Confirmatory Factor Analyses for Sleep Measures: Standardised Factor Loadings And Model Fit Indices (Chi-square Test, RMSE, CFI, and TLI)**

|                                                              | Wave 1<br>4/5 years | Wave 2<br>6/7 years | Wave 3<br>8/9 years | Wave 4<br>10/11<br>years | Wave 5<br>12/13<br>years |
|--------------------------------------------------------------|---------------------|---------------------|---------------------|--------------------------|--------------------------|
| Sleep problem                                                |                     |                     |                     |                          |                          |
| Difficulty getting off to sleep                              | 0.71                | 0.74                | 0.78                | 0.80                     | 0.81                     |
| Not happy to sleep alone                                     | 0.64                | 0.66                | 0.65                | 0.63                     | 0.49                     |
| Waking during the night                                      | 0.64                | 0.67                | 0.68                | 0.71                     | 0.69                     |
| Seeming tired in the morning                                 | 0.60                | 0.67                | 0.76                | 0.70                     | 0.76                     |
| How much is child's sleeping<br>pattern or habits a problem? | 0.91                | 0.88                | 0.89                | 0.88                     | 0.82                     |
| Model fit indices                                            |                     |                     |                     |                          |                          |
| $\chi^2$ (degrees of freedom)                                | 68.525 (5)          | 80.730 (5)          | 56.660 (5)          | 53.010 (5)               | 2.345 (5)                |
| RMSEA                                                        | 0.051               | 0.058               | 0.049               | 0.048                    | 0.000                    |
| CFI                                                          | 0.982               | 0.970               | 0.983               | 0.983                    | 1.000                    |
| TLI                                                          | 0.964               | 0.940               | 0.966               | 0.965                    | 1.002                    |

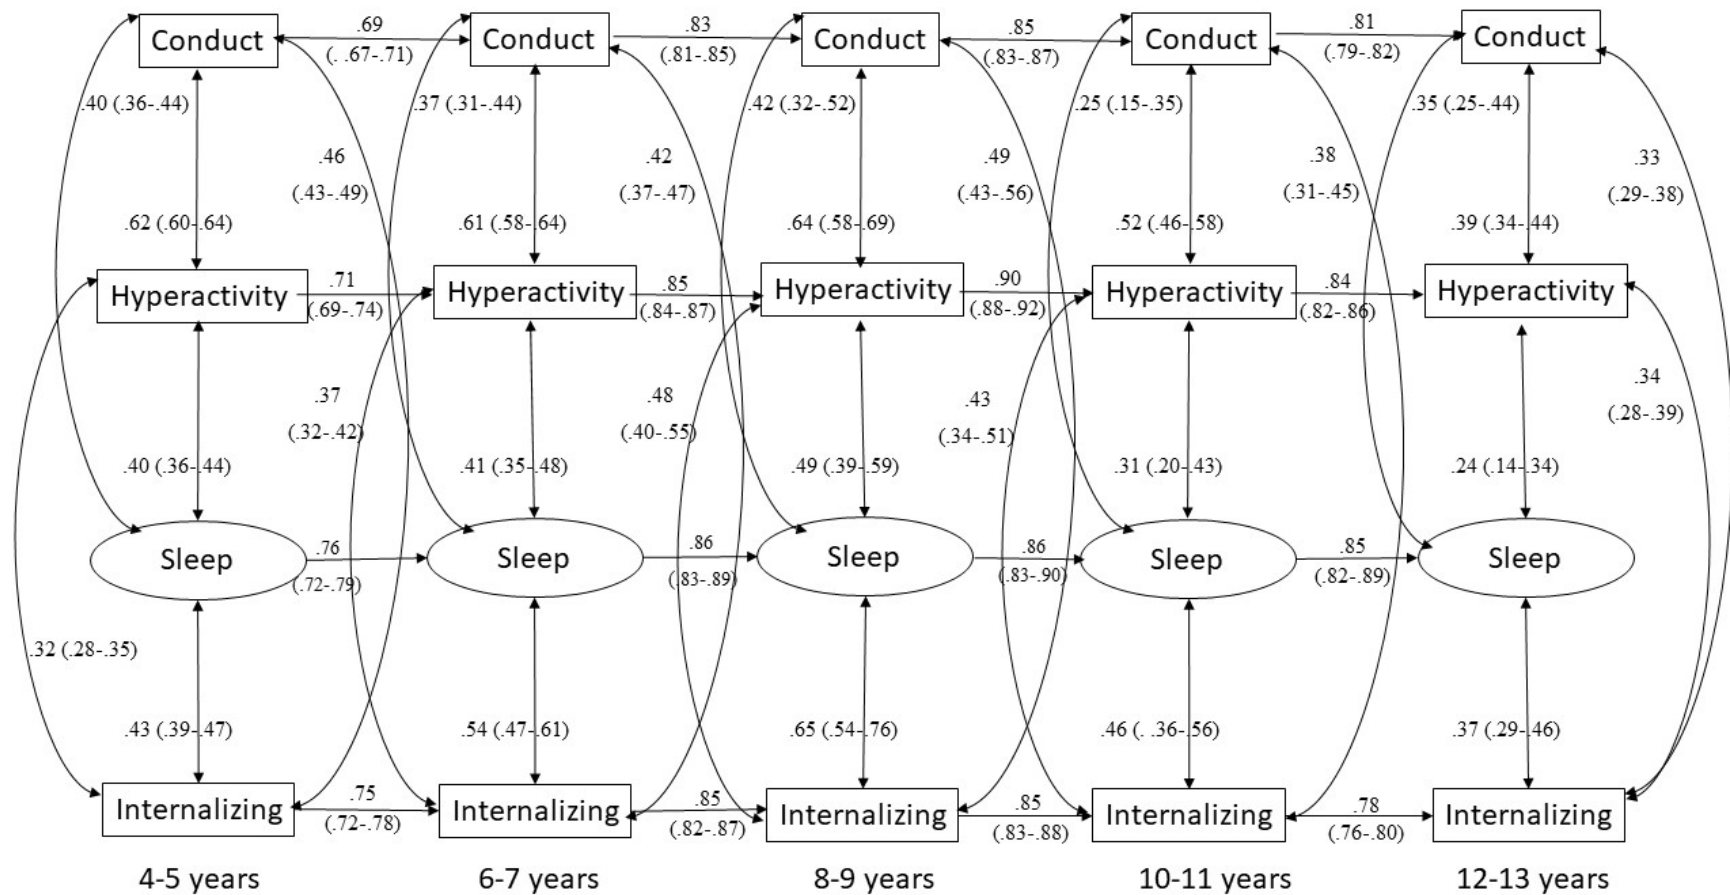

**eFigure 1. Autoregressive and Cross-sectional Correlations Model for Sleep, Internalizing, Hyperactivity and Conduct Problems.**

Fit indices:  $\chi^2(df) = 3442 (679)$ ; RMSEA = .03; CFI = .95; TLI = .94. Standardized estimates (standard errors) are shown. Factor loadings for the five sleep problem indicator variables are not shown.

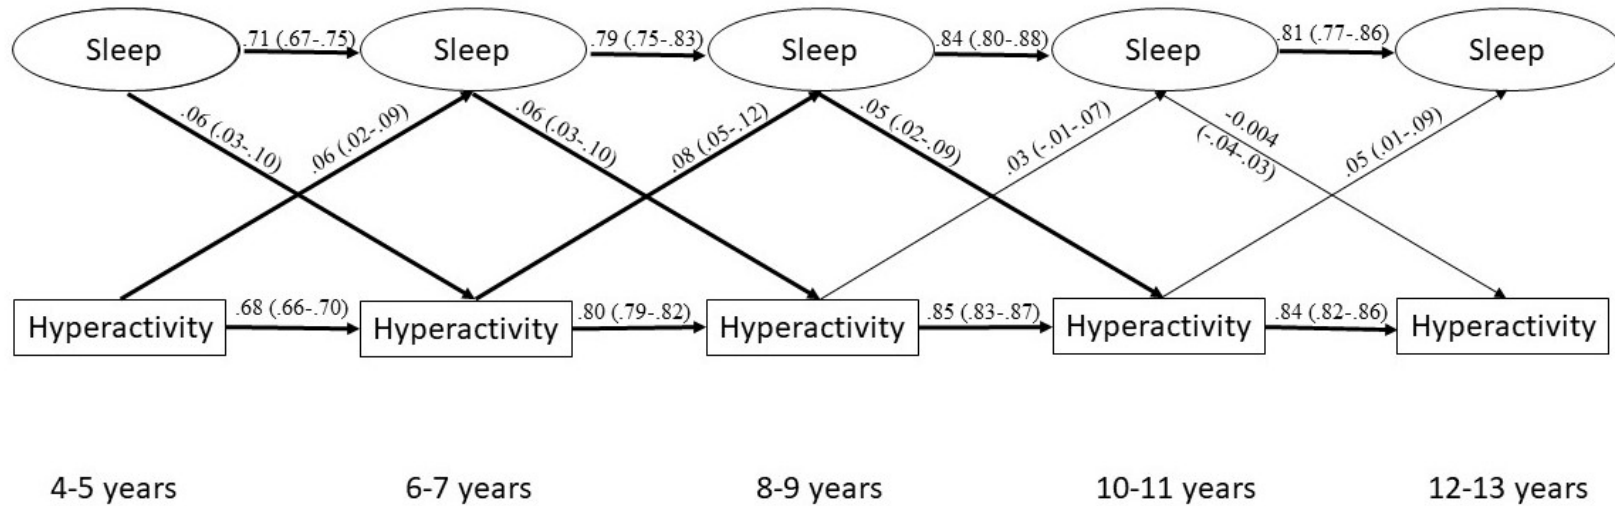

**eFigure 2. Transactional Model for Sleep and Hyperactivity.**

Fit indices:  $\chi^2(df) = 1220(359)$ ; RMSEA = .02, CFI = .98, TLI = .97. Standardized estimates (standard errors) are shown. Thick lines indicate significant paths at  $p < 0.01$ . Cross-sectional correlations among constructs were estimated but are not shown here. Factor loadings for the five sleep problem indicator variables are not shown.

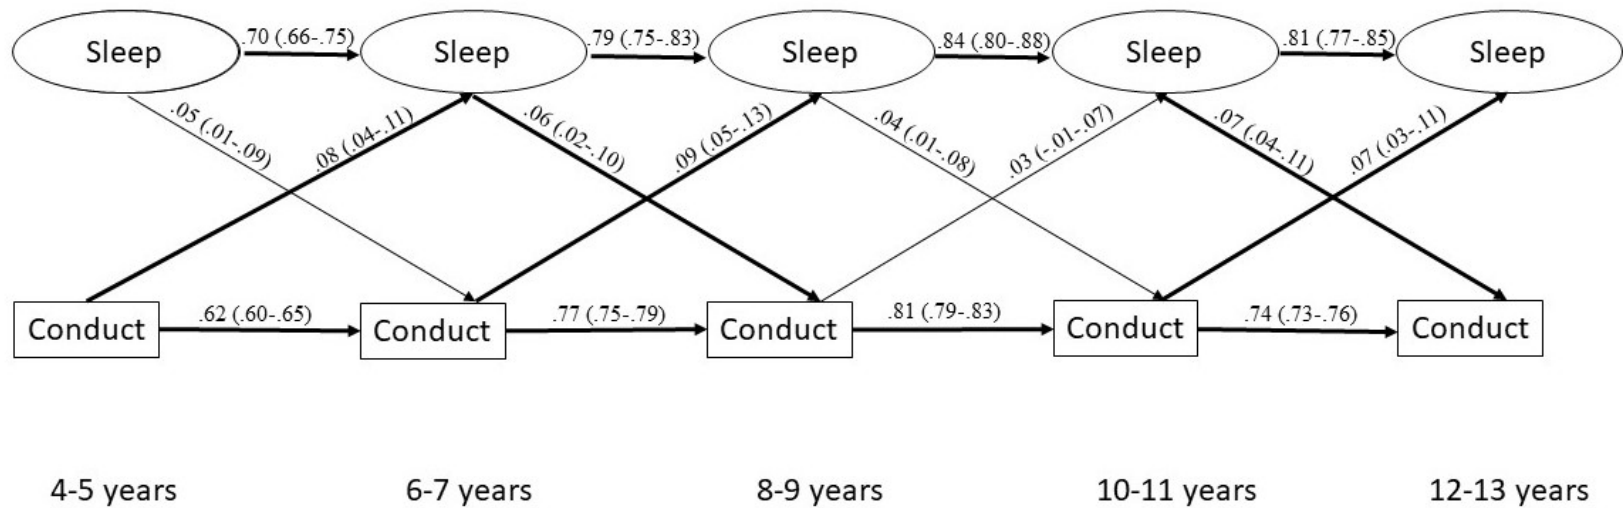

**eFigure 3. Transactional Model for Sleep and Conduct Problems.**

Fit indices:  $\chi^2(df) = 1404 (359)$ ; RMSEA = .02; CFI = .97; TLI = .97. Standardized estimates (standard errors) are shown. Thick lines indicate significant paths at  $p < 0.01$ . Cross-sectional correlations among constructs were estimated but are not shown here. Factor loadings for the five sleep problem indicator variables are not shown.

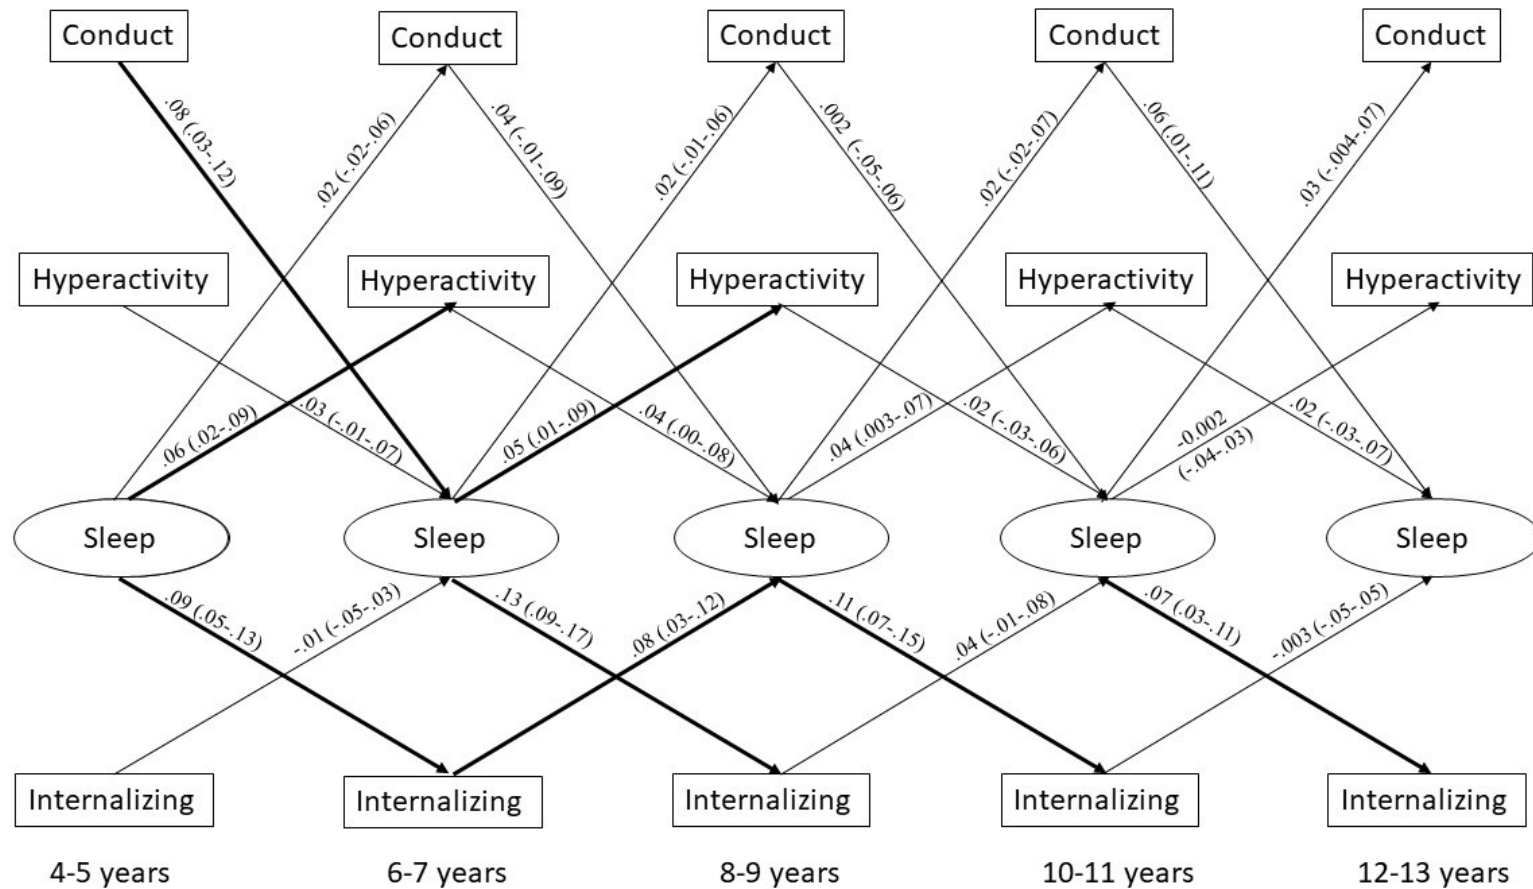

**eFigure 4. Transactional Model for Sleep, Internalizing, Hyperactivity, and Conduct Problems.**

Fit indices:  $\chi^2(df)=2201$  (631); RMSEA = .02; CFI = .97; TLI = .96. Standardized estimates (standard errors) are shown. Thick lines indicate significant paths at  $p < 0.01$ . Autoregressive paths, cross-sectional correlations among constructs, and cross-lagged paths between internalizing, hyperactivity and conduct problems were estimated but are not shown here. Factor loadings for the five sleep problem indicator variables are not shown.
